# Supplementary material
Source: PubMed Central journal article supplement (PMC4229707)
Supplement: Supp_Fig1.pdf [file Supp_Fig1.pdf]

## Supplementary Data

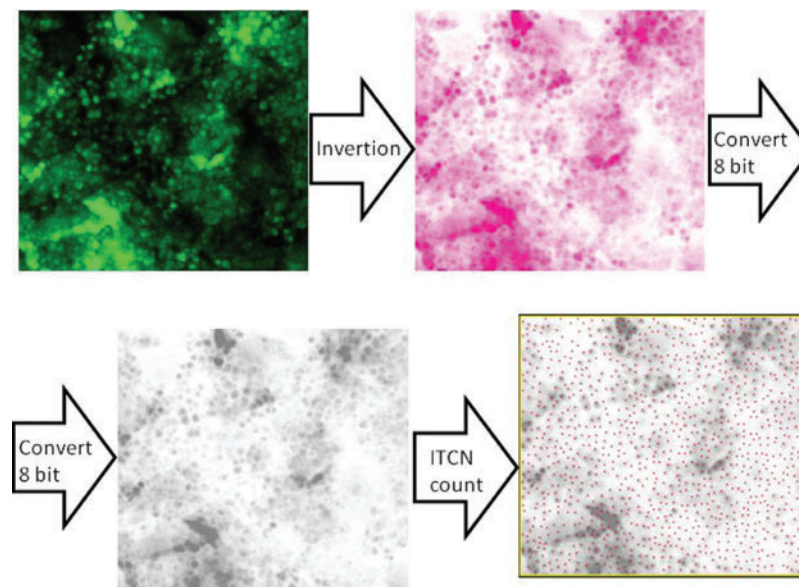

**SUPPLEMENTARY FIG. S1.** Sequential steps for the quantification of lymphocytes from microscopy images. The original image is treated to have the lowest background from natural polymers as possible. It is then inverted and converted to 8-bit image. The size of the cells and mean distance expected between them is inserted in the ITCN software (ImageJ, NIH), and an output image is generated with red dots in the spots counted as cells. The quantification of macrophages was not performed by the method indicated in figure. The shape of macrophages varies during the time of implantations while lymphocytes are kept as round cells. Moreover, the natural polymers background in most of the polymeric combinations made the application of image techniques for the quantification of such cells difficult. As such, we attributed a score system for the quantification of macrophages on-chip, as indicated in the article.
