# Supplementary material
Source: PubMed Central journal article supplement (PMC4229707)
Supplement: Supp_Fig2-7.pdf [file Supp_Fig2-7.pdf]

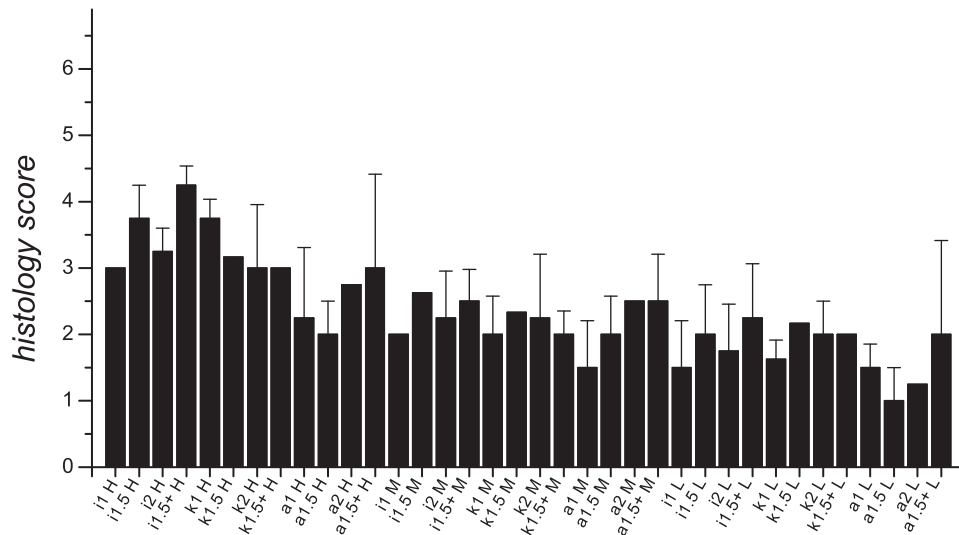

**SUPPLEMENTARY FIG. S2.** Histology scores attributed to the histology cuts performed to the tissue around the implanted chips after 24 h of implantation (average value + standard deviation [SD],  $n \geq 4$ ). The conditions are abbreviated according to: A, Alg; k, k-Carr;  $\iota$ ,  $\iota$ -Carr. The percentage of chi is indicated with 1, 1.5, 2, and 1.5+ for 1%, 1.5%, 2%, and 1.5+%, respectively. The dilutions of polymer B are indicated according to the nomenclature adopted in the article. Alg, alginate; Chi, chitosan; k-Carr, k-carrageenan;  $\iota$ -Carr,  $\iota$ -carrageenan.

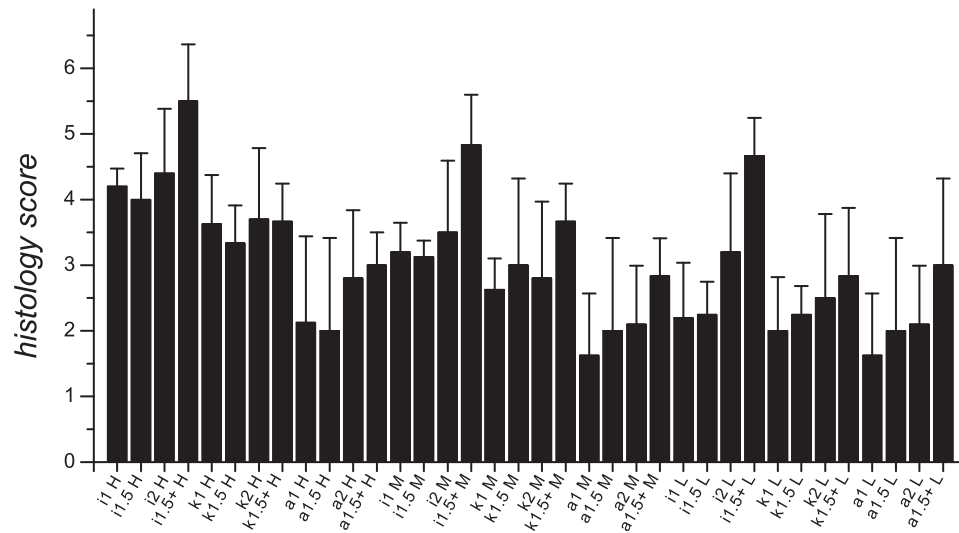

**SUPPLEMENTARY FIG. S3.** Histology scores attributed to the histology cuts performed to the tissue around the implanted chips after 7 days of implantation (average value+SD,  $n \geq 4$ ). The conditions are abbreviated according to: A, Alg; k, k-Carr; i, i-Carr. The percentage of Chi is indicated with 1, 1.5, 2, and 1.5+ for 1%, 1.5%, 2%, and 1.5+%, respectively. The dilutions of polymer B are indicated according to the nomenclature adopted in the article.

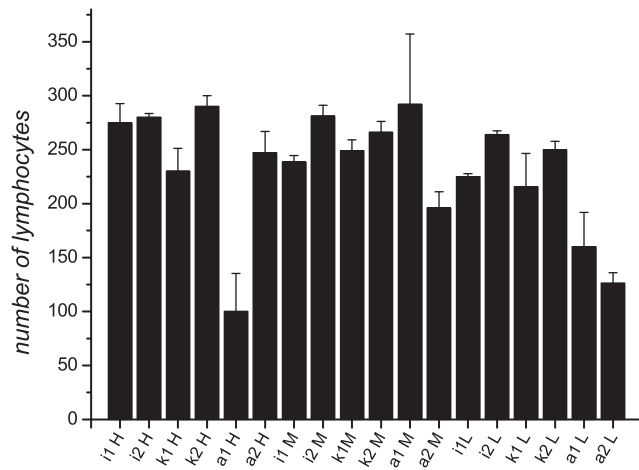

**SUPPLEMENTARY FIG. S4.** Quantification of lymphocytes on-chip (cells/100×100 pixel<sup>2</sup>) after 24 h of implantation. Bars indicate the cell number average value + SD ( $n \geq 4$ ). The conditions are abbreviated according to: A, Alg; k, k-Carr;  $\iota$ ,  $\iota$ -Carr. The percentage of Chi is indicated with 1, 1.5, 2, and 1.5+ for 1%, 1.5%, 2%, and 1.5+%, respectively. The dilutions of polymer B are indicated according to the nomenclature adopted in the article.

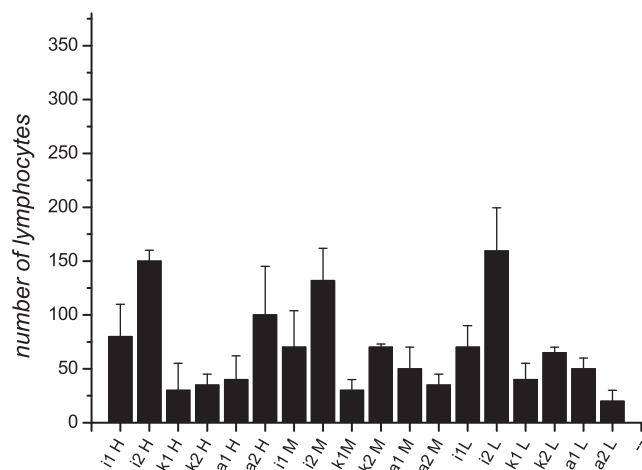

**SUPPLEMENTARY FIG. S5.** Quantification of lymphocytes on-chip (cells/100×100 pixel<sup>2</sup>) after 7 days of implantation. Bars indicate the cell number average value + SD ( $n \geq 4$ ). The conditions are abbreviated according to: A, Alg; k, k-Carr; i, i-Carr. The percentage of Chi is indicated with 1, 1.5, 2, and 1.5+ for 1%, 1.5%, 2%, and 1.5+%, respectively. The dilutions of polymer B are indicated according to the nomenclature adopted in the article.

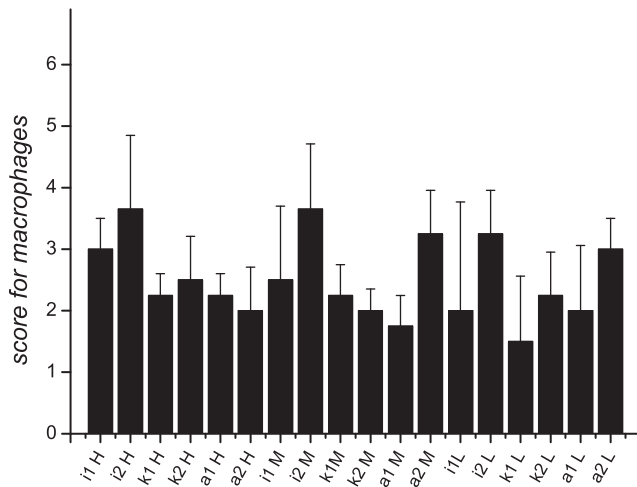

**SUPPLEMENTARY FIG. S6.** Score attributed to on-chip immunocytochemistry images of macrophages after 24 h of implantation. Bars indicate the score average value + SD ( $n \geq 4$ ). The conditions are abbreviated according to: A, Alg; k, k-Carr;  $\iota$ ,  $\iota$ -Carr. The percentage of Chi is indicated with 1, 1.5, 2, and 1.5+ for 1%, 1.5%, 2%, and 1.5+%, respectively. The dilutions of polymer B are indicated according to the nomenclature adopted in the article.

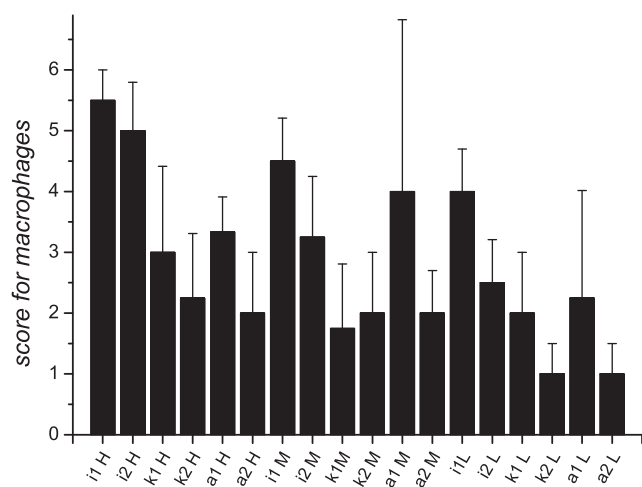

**SUPPLEMENTARY FIG. S7.** Score attributed to on-chip immunocytochemistry images of macrophages after 7 days of implantation. Bars indicate the score average value + SD ( $n \geq 4$ ). The conditions are abbreviated according to: A, Alg; k, k-Carr; i, i-Carr. The percentage of Chi is indicated with 1, 1.5, 2, and 1.5+ for 1%, 1.5%, 2%, and 1.5+ %, respectively. The dilutions of polymer B are indicated according to the nomenclature adopted in the article.
