# Supplementary material
Source: PubMed Central journal article supplement (PMC4229707)
Supplement: Supp_Fig2.pdf [file Supp_Fig2.pdf]

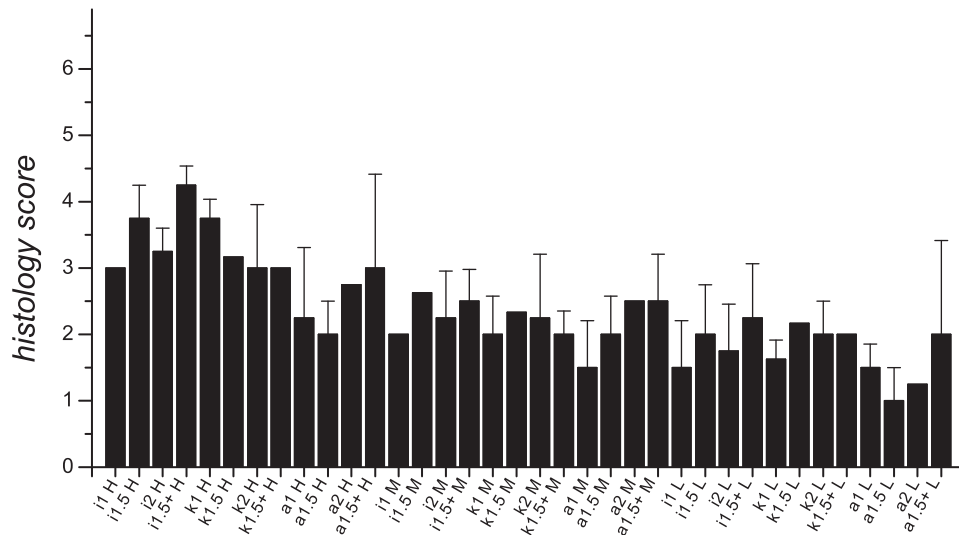

**SUPPLEMENTARY FIG. S2.** Histology scores attributed to the histology cuts performed to the tissue around the implanted chips after 24 h of implantation (average value + standard deviation [SD],  $n \geq 4$ ). The conditions are abbreviated according to: A, Alg; k, k-Carr;  $\iota$ ,  $\iota$ -Carr. The percentage of chi is indicated with 1, 1.5, 2, and 1.5+ for 1%, 1.5%, 2%, and 1.5+%, respectively. The dilutions of polymer B are indicated according to the nomenclature adopted in the article. Alg, alginate; Chi, chitosan; k-Carr, k-carrageenan;  $\iota$ -Carr,  $\iota$ -carrageenan.
