# Supplementary material
Source: PubMed Central journal article supplement (PMC4229707)
Supplement: Supp_Fig3.pdf [file Supp_Fig3.pdf]

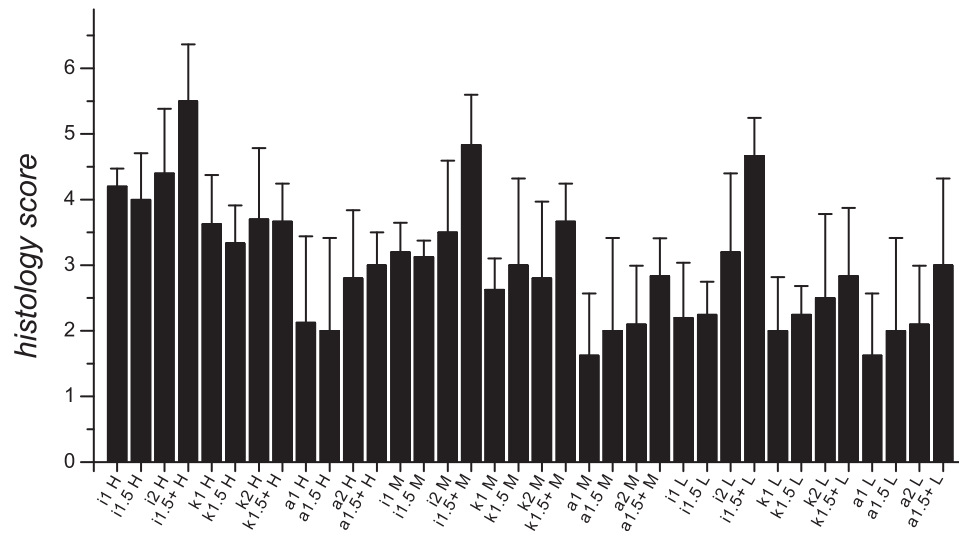

**SUPPLEMENTARY FIG. S3.** Histology scores attributed to the histology cuts performed to the tissue around the implanted chips after 7 days of implantation (average value+SD,  $n \geq 4$ ). The conditions are abbreviated according to: A, Alg; k, k-Carr; i, i-Carr. The percentage of Chi is indicated with 1, 1.5, 2, and 1.5+ for 1%, 1.5%, 2%, and 1.5+%, respectively. The dilutions of polymer B are indicated according to the nomenclature adopted in the article.
