# Supplementary material
Source: PubMed Central journal article supplement (PMC4229707)
Supplement: Supp_Fig8.pdf [file Supp_Fig8.pdf]

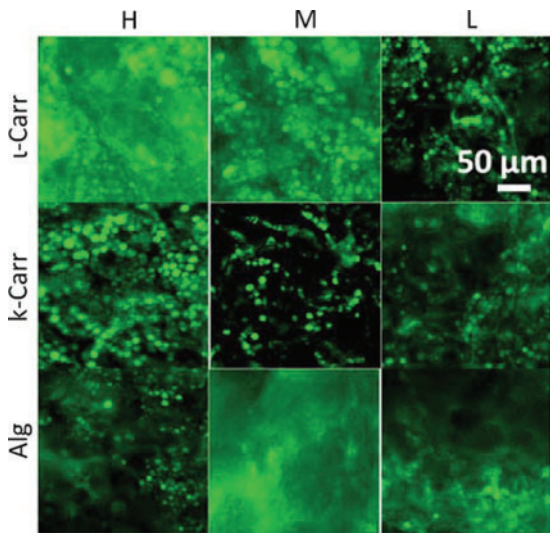

**SUPPLEMENTARY FIG. S8.** Lymphocytes immunocytochemistry images (in green) from a control chip (1% Chi) after 24 h of implantation. The biomaterials conditions were disposed in the chip randomly, according to the configuration in Supplementary Table S1. Results regarding lymphocytes quantification in control chips and comparison with normal chips can be found in Figure 8 in the article.
