# Supplementary material
Source: PubMed Central journal article supplement (PMC4229707)
Supplement: Supp_Fig9.pdf [file Supp_Fig9.pdf]

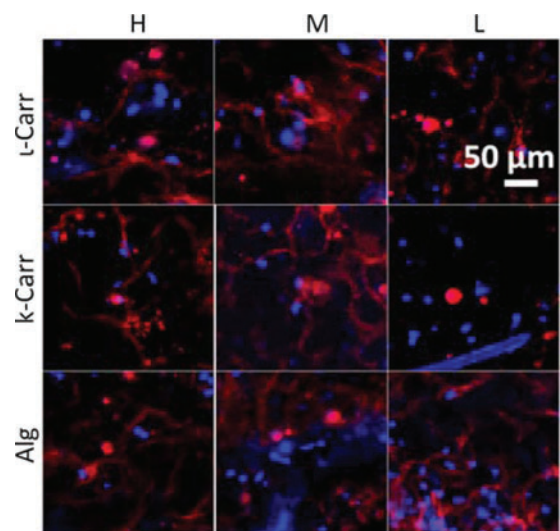

**SUPPLEMENTARY FIG. S9.** Macrophages immunocytochemistry images (in red) from a control chip after 24 h of implantation, where the biomaterials conditions in the chip were disposed randomly, according to the configuration in Supplementary Table S1. Results regarding macrophages scoring in control chips and comparison with normal chips can be found in Figure 8 in the article.
