# Supplementary material
Source: PubMed Central journal article supplement (PMC4229707)
Supplement: Supp_Table1.pdf [file Supp_Table1.pdf]

SUPPLEMENTARY TABLE S1. (A) CONFIGURATION OF THE CHIP IMPLANTED DURING THE MAIN EXPERIMENT. (B) CONFIGURATION OF THE CONTROL CHIP WITH RANDOMLY GENERATED POSITIONS OF THE BIOMATERIALS

| <b>a</b> |          |          | <b>b</b> |          |          |
|----------|----------|----------|----------|----------|----------|
| ι-Carr H | ι-Carr M | ι-Carr L | ι-Carr M | k-Carr H | Alg H    |
| k-Carr H | k-Carr M | k-Carr L | Alg M    | ι-Carr H | k-Carr L |
| Alg H    | Alg M    | Alg L    | ι-Carr L | k-Carr M | Alg L    |

All conditions were prepared from 1% Chi.  
Chi, chitosan.
