# Supplementary material
Source: PubMed Central journal article supplement (PMC4229707)
Supplement: Supp_Table2.pdf [file Supp_Table2.pdf]

SUPPLEMENTARY TABLE S2. STATISTICALLY RELEVANT DIFFERENCES (CONSIDERED FOR  $P < 0.05$ ) BETWEEN ON-CHIP CONDITIONS ACCORDING TO TWO-WAY ANALYSIS OF VARIANCE WITH BONFERRONI POSTTEST

|                         | 24 h                           |                         |               | Day 7              |                   |                        |
|-------------------------|--------------------------------|-------------------------|---------------|--------------------|-------------------|------------------------|
|                         | <i>Histology</i>               | <i>Lymph.</i>           | <i>Macro.</i> | <i>Histology</i>   | <i>Lymph.</i>     | <i>Macro.</i>          |
| H vs. M                 | ι1.5+, k1, k1.5                | A1, A1.5                | X             | X                  | A2                | X                      |
| H vs. L                 | ι1, ι1.5, ι2,<br>ι1.5+, k1, A2 | A1, A1.5, A2            | X             | ι1, ι1.5           | A2                | X                      |
| M vs. L                 | k1.5                           | k1, A1, A2              | X             | X                  | X                 | X                      |
| ι-Carr vs. k-Carr       | X                              | X                       | X             | 1.5+H, 1.5+L       | ι2, k2, A2        | X                      |
| ι-Carr vs. Alg          | 1.5H                           | 1H, 2H, 1M,<br>1.5M, 2L | X             | 1H, 1.5H,<br>1.5+M | ι2, a2            | 1H, 1.5H,<br>2H, 1.5+H |
| k-Carr vs. Alg          | 1H                             | 1H, 2H, 1M,<br>1.5M, 2L | X             | X                  | X                 | X                      |
| 1% Chi vs. 1.5% Chi     | X                              | X                       | X             | X                  | X                 | X                      |
| 1% Chi vs. 2% Chi       | X                              | AH, kM, kL,<br>AM, AL   | X             | X                  | ιH, kH,<br>AH, ιL | X                      |
| 1% Chi vs. 1.5% + Chi   | X                              | X                       | X             | X                  | X                 | ιM                     |
| 1.5% Chi vs. 2% Chi     | X                              | X                       | X             | X                  | X                 | X                      |
| 1.5% Chi vs. 1.5% + Chi | X                              | X                       | X             | X                  | X                 | ιM                     |
| 2% Chi vs. 1.5% + Chi   | X                              | X                       | X             | X                  | X                 | X                      |

“X” indicates the inexistence of statistically significant differences between conditions. The conditions are abbreviated according to: A, Alg; k, k-Carr; ι, ι-Carr. The percentage of Chi is indicated with 1, 1.5, 2, and 1.5+ for 1%, 1.5%, 2%, and 1.5+%, respectively. The dilutions of polymer B are indicated according to the nomenclature adopted in the article.

Alg, alginate; k-Carr, k-carrageenan; ι-Carr, ι-carrageenan; Lymph., lymphocytes; Macro., macrophages.
